# Supplementary material for: The molecular characteristics of high-grade gastroenteropancreatic neuroendocrine neoplasms
Source: PubMed Central journal article supplement (PMC8630776; doi:10.1530/erc-21-0152), 2021-10-14
Supplement: supplementary_figure_2.pdf [file supplementary_figure_2.pdf]

| Study   | OR   | Odds Ratio | 95%-CI (random) | Weight |
|---------|------|------------|-----------------|--------|
| MYC     | 0.17 |            | [0.04; 0.80]    | 1.9%   |
| AMER1   | 0.17 |            | [0.03; 1.06]    | 1.4%   |
| ABL1    | 0.28 |            | [0.03; 2.94]    | 0.8%   |
| EP300   | 0.28 |            | [0.03; 2.94]    | 0.8%   |
| KMT2C   | 0.28 |            | [0.03; 2.94]    | 0.8%   |
| MITF    | 0.28 |            | [0.03; 2.94]    | 0.8%   |
| GNAS    | 0.31 |            | [0.07; 1.29]    | 2.3%   |
| KDM5A   | 0.36 |            | [0.10; 1.22]    | 3.1%   |
| ESR1    | 0.38 |            | [0.12; 1.22]    | 3.4%   |
| GPC5    | 0.38 |            | [0.04; 3.69]    | 0.9%   |
| IGF2R   | 0.38 |            | [0.04; 3.69]    | 0.9%   |
| MAP2K4  | 0.38 |            | [0.04; 3.69]    | 0.9%   |
| MAP3K4  | 0.38 |            | [0.04; 3.69]    | 0.9%   |
| APC     | 0.40 |            | [0.12; 1.27]    | 3.4%   |
| RB1     | 0.44 |            | [0.14; 1.43]    | 3.4%   |
| ATRX    | 0.48 |            | [0.05; 4.45]    | 0.9%   |
| BRCA2   | 0.48 |            | [0.05; 4.45]    | 0.9%   |
| PRDM9   | 0.48 |            | [0.05; 4.45]    | 0.9%   |
| NOTCH1  | 0.58 |            | [0.06; 5.23]    | 1.0%   |
| PREX2   | 0.58 |            | [0.06; 5.23]    | 1.0%   |
| SLIT2   | 0.58 |            | [0.06; 5.23]    | 1.0%   |
| KRAS    | 0.59 |            | [0.17; 2.06]    | 2.9%   |
| CTNNB1  | 0.68 |            | [0.08; 6.03]    | 1.0%   |
| ARID1A  | 0.73 |            | [0.23; 2.29]    | 3.5%   |
| ACVR2A  | 0.74 |            | [0.04; 15.12]   | 0.5%   |
| ALK     | 0.74 |            | [0.04; 15.12]   | 0.5%   |
| ASXL1   | 0.74 |            | [0.04; 15.12]   | 0.5%   |
| AXIN1   | 0.74 |            | [0.04; 15.12]   | 0.5%   |
| BCOR    | 0.74 |            | [0.04; 15.12]   | 0.5%   |
| CARD11  | 0.74 |            | [0.04; 15.12]   | 0.5%   |
| CDC73   | 0.74 |            | [0.04; 15.12]   | 0.5%   |
| CHD1L   | 0.74 |            | [0.04; 15.12]   | 0.5%   |
| CREBBP  | 0.74 |            | [0.04; 15.12]   | 0.5%   |
| EPHA5   | 0.74 |            | [0.04; 15.12]   | 0.5%   |
| EPHB4   | 0.74 |            | [0.04; 15.12]   | 0.5%   |
| ERBB3   | 0.74 |            | [0.04; 15.12]   | 0.5%   |
| ERCC4   | 0.74 |            | [0.04; 15.12]   | 0.5%   |
| FGFR4   | 0.74 |            | [0.04; 15.12]   | 0.5%   |
| GATA3   | 0.74 |            | [0.04; 15.12]   | 0.5%   |
| GRID1   | 0.74 |            | [0.04; 15.12]   | 0.5%   |
| HOXA3   | 0.74 |            | [0.04; 15.12]   | 0.5%   |
| IRS2    | 0.74 |            | [0.04; 15.12]   | 0.5%   |
| JAK3    | 0.74 |            | [0.04; 15.12]   | 0.5%   |
| LTK     | 0.74 |            | [0.04; 15.12]   | 0.5%   |
| MAP3K1  | 0.74 |            | [0.04; 15.12]   | 0.5%   |
| MAP3K14 | 0.74 |            | [0.04; 15.12]   | 0.5%   |
| MAP3K6  | 0.74 |            | [0.04; 15.12]   | 0.5%   |
| MAPK8   | 0.74 |            | [0.04; 15.12]   | 0.5%   |
| MDM2    | 0.74 |            | [0.04; 15.12]   | 0.5%   |
| MED12   | 0.74 |            | [0.04; 15.12]   | 0.5%   |
| MED13   | 0.74 |            | [0.04; 15.12]   | 0.5%   |
| MSH6    | 0.74 |            | [0.04; 15.12]   | 0.5%   |
| MTDH    | 0.74 |            | [0.04; 15.12]   | 0.5%   |
| MYB     | 0.74 |            | [0.04; 15.12]   | 0.5%   |
| NCOA2   | 0.74 |            | [0.04; 15.12]   | 0.5%   |
| NGFR    | 0.74 |            | [0.04; 15.12]   | 0.5%   |
| NKX2-1  | 0.74 |            | [0.04; 15.12]   | 0.5%   |
| NTRK2   | 0.74 |            | [0.04; 15.12]   | 0.5%   |
| PBRM1   | 0.74 |            | [0.04; 15.12]   | 0.5%   |
| PHLPP2  | 0.74 |            | [0.04; 15.12]   | 0.5%   |
| PIK3R1  | 0.74 |            | [0.04; 15.12]   | 0.5%   |
| PPP2R1A | 0.74 |            | [0.04; 15.12]   | 0.5%   |
| PRDM1   | 0.74 |            | [0.04; 15.12]   | 0.5%   |
| PRKCI   | 0.74 |            | [0.04; 15.12]   | 0.5%   |
| PTCH2   | 0.74 |            | [0.04; 15.12]   | 0.5%   |
| PTEN    | 0.74 |            | [0.04; 15.12]   | 0.5%   |
| PTPN11  | 0.74 |            | [0.04; 15.12]   | 0.5%   |
| RUNX1   | 0.74 |            | [0.04; 15.12]   | 0.5%   |
| SETD2   | 0.74 |            | [0.04; 15.12]   | 0.5%   |
| TBX3    | 0.74 |            | [0.04; 15.12]   | 0.5%   |
| TGFBR2  | 0.74 |            | [0.04; 15.12]   | 0.5%   |
| WT1     | 0.74 |            | [0.04; 15.12]   | 0.5%   |
| ATM     | 0.85 |            | [0.26; 2.74]    | 3.3%   |
| BRAF    | 0.87 |            | [0.22; 3.40]    | 2.5%   |
| NF1     | 0.89 |            | [0.10; 7.66]    | 1.0%   |
| ARID1B  | 0.96 |            | [0.05; 18.82]   | 0.5%   |
| BPTF    | 0.96 |            | [0.05; 18.82]   | 0.5%   |
| BRCA1   | 0.96 |            | [0.05; 18.82]   | 0.5%   |
| CDKN2A  | 0.96 |            | [0.05; 18.82]   | 0.5%   |
| CIC     | 0.96 |            | [0.05; 18.82]   | 0.5%   |
| COL22A1 | 0.96 |            | [0.05; 18.82]   | 0.5%   |
| DICER1  | 0.96 |            | [0.05; 18.82]   | 0.5%   |
| EGFR    | 0.96 |            | [0.05; 18.82]   | 0.5%   |
| EMSY    | 0.96 |            | [0.05; 18.82]   | 0.5%   |
| EPHA7   | 0.96 |            | [0.05; 18.82]   | 0.5%   |
| FOXO1   | 0.96 |            | [0.05; 18.82]   | 0.5%   |
| HNF1A   | 0.96 |            | [0.05; 18.82]   | 0.5%   |
| KEAP1   | 0.96 |            | [0.05; 18.82]   | 0.5%   |
| KIT     | 0.96 |            | [0.05; 18.82]   | 0.5%   |
| MAP4K4  | 0.96 |            | [0.05; 18.82]   | 0.5%   |
| MET     | 0.96 |            | [0.05; 18.82]   | 0.5%   |
| PDGFRA  | 0.96 |            | [0.05; 18.82]   | 0.5%   |
| ROBO2   | 0.96 |            | [0.05; 18.82]   | 0.5%   |
| TNFAIP3 | 0.96 |            | [0.05; 18.82]   | 0.5%   |
| CDH2    | 1.18 |            | [0.06; 22.58]   | 0.5%   |
| EPHA3   | 1.18 |            | [0.06; 22.58]   | 0.5%   |
| ERBB2   | 1.18 |            | [0.06; 22.58]   | 0.5%   |
| ERBB4   | 1.18 |            | [0.06; 22.58]   | 0.5%   |
| FANCA   | 1.18 |            | [0.06; 22.58]   | 0.5%   |
| FLT4    | 1.18 |            | [0.06; 22.58]   | 0.5%   |
| KDM6A   | 1.18 |            | [0.06; 22.58]   | 0.5%   |
| MYO3A   | 1.18 |            | [0.06; 22.58]   | 0.5%   |
| NOTCH3  | 1.18 |            | [0.06; 22.58]   | 0.5%   |
| NOTCH4  | 1.18 |            | [0.06; 22.58]   | 0.5%   |
| PIK3CG  | 1.18 |            | [0.06; 22.58]   | 0.5%   |
| PLCG1   | 1.18 |            | [0.06; 22.58]   | 0.5%   |
| PTCH1   | 1.18 |            | [0.06; 22.58]   | 0.5%   |
| RET     | 1.18 |            | [0.06; 22.58]   | 0.5%   |
| ROS1    | 1.18 |            | [0.06; 22.58]   | 0.5%   |
| SMO     | 1.18 |            | [0.06; 22.58]   | 0.5%   |
| TSC2    | 1.18 |            | [0.06; 22.58]   | 0.5%   |
| EP400   | 1.41 |            | [0.08; 26.42]   | 0.5%   |
| EPHB1   | 1.41 |            | [0.08; 26.42]   | 0.5%   |
| RICTOR  | 1.41 |            | [0.08; 26.42]   | 0.5%   |
| TP73    | 1.41 |            | [0.08; 26.42]   | 0.5%   |
| CHD1    | 1.64 |            | [0.09; 30.32]   | 0.5%   |
| PIK3CA  | 1.64 |            | [0.09; 30.32]   | 0.5%   |
| SMAD4   | 1.64 |            | [0.09; 30.32]   | 0.5%   |
| NTRK3   | 1.87 |            | [0.10; 34.29]   | 0.5%   |
| SMARCA4 | 1.87 |            | [0.10; 34.29]   | 0.5%   |
| SOX9    | 1.87 |            | [0.10; 34.29]   | 0.5%   |
| KMT2A   | 2.11 |            | [0.12; 38.32]   | 0.5%   |
| RNF43   | 2.11 |            | [0.12; 38.32]   | 0.5%   |
| TP53    | 2.20 |            | [0.70; 6.95]    | 3.5%   |
| FBXW7   | 3.89 |            | [0.22; 68.59]   | 0.6%   |
| KMT2D   | 4.44 |            | [0.25; 77.93]   | 0.6%   |

0.1 0.5 1 2 10
