# Supplementary material for: The molecular characteristics of high-grade gastroenteropancreatic neuroendocrine neoplasms
Source: PubMed Central journal article supplement (PMC8630776; doi:10.1530/erc-21-0152), 2021-10-14

**A**

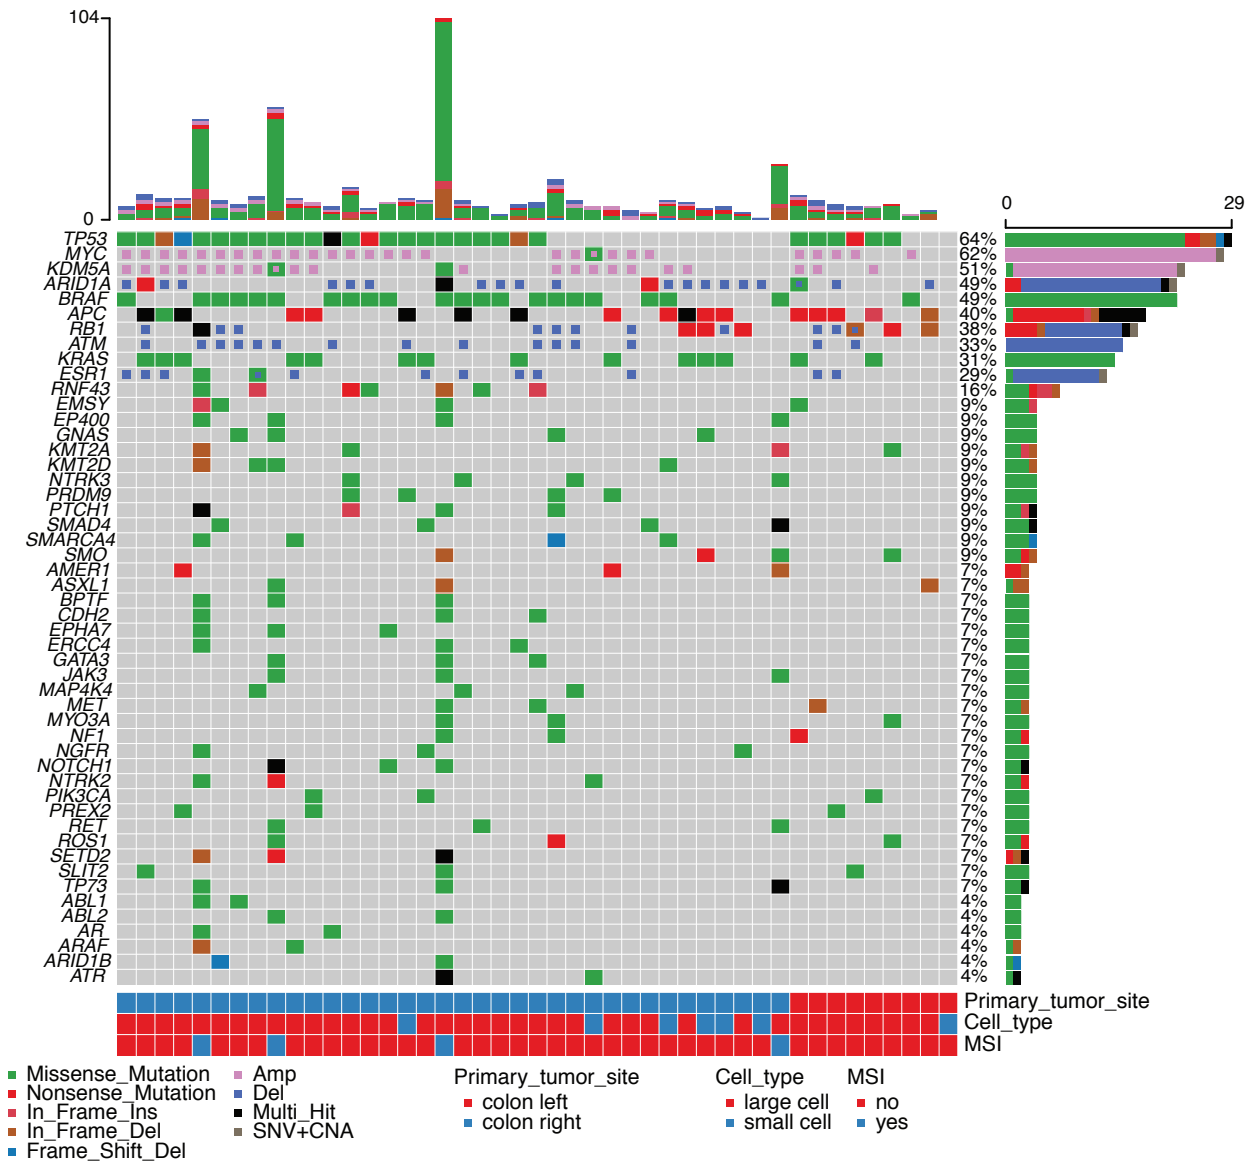

**B**

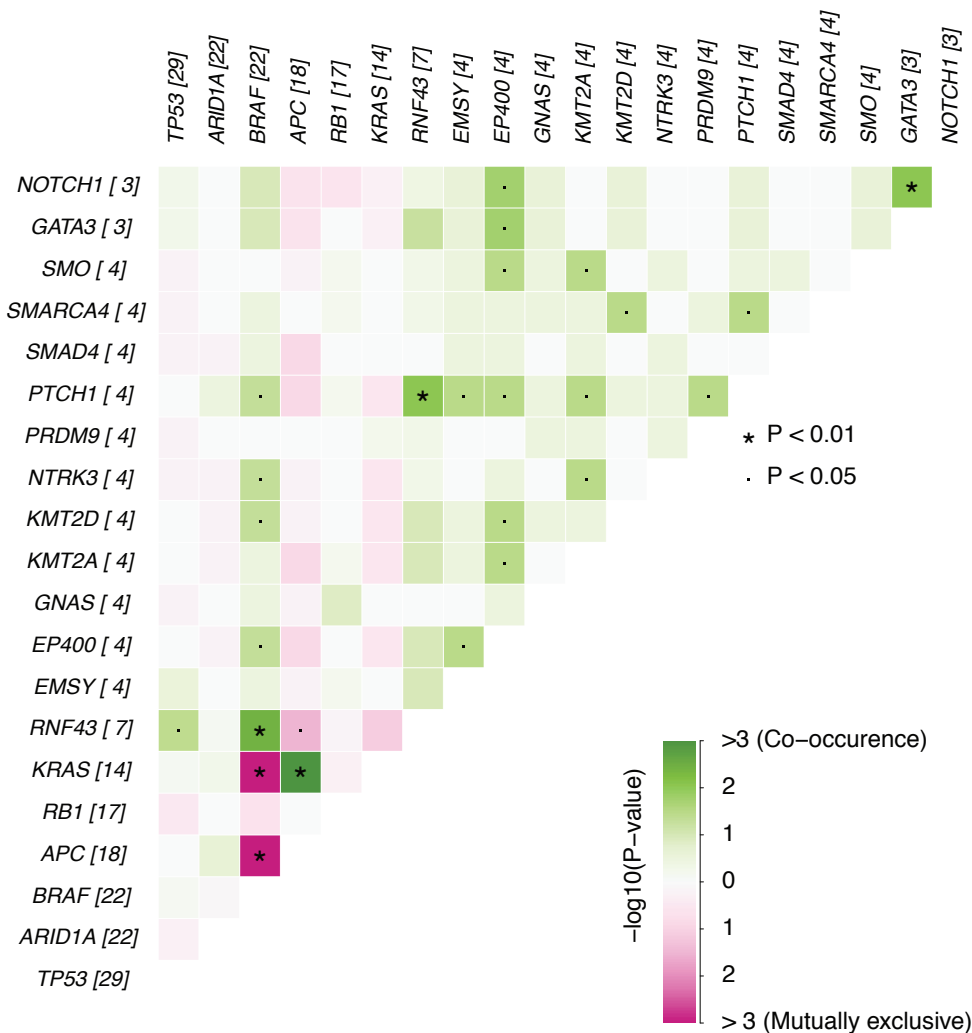

Supplement: supplementary_figure_4.pdf [file supplementary_figure_4.pdf]
