# Supplementary material for: The molecular characteristics of high-grade gastroenteropancreatic neuroendocrine neoplasms
Source: PubMed Central journal article supplement (PMC8630776; doi:10.1530/erc-21-0152), 2021-10-14
Supplement: supplementary_figure_11.pdf [file supplementary_figure_11.pdf]

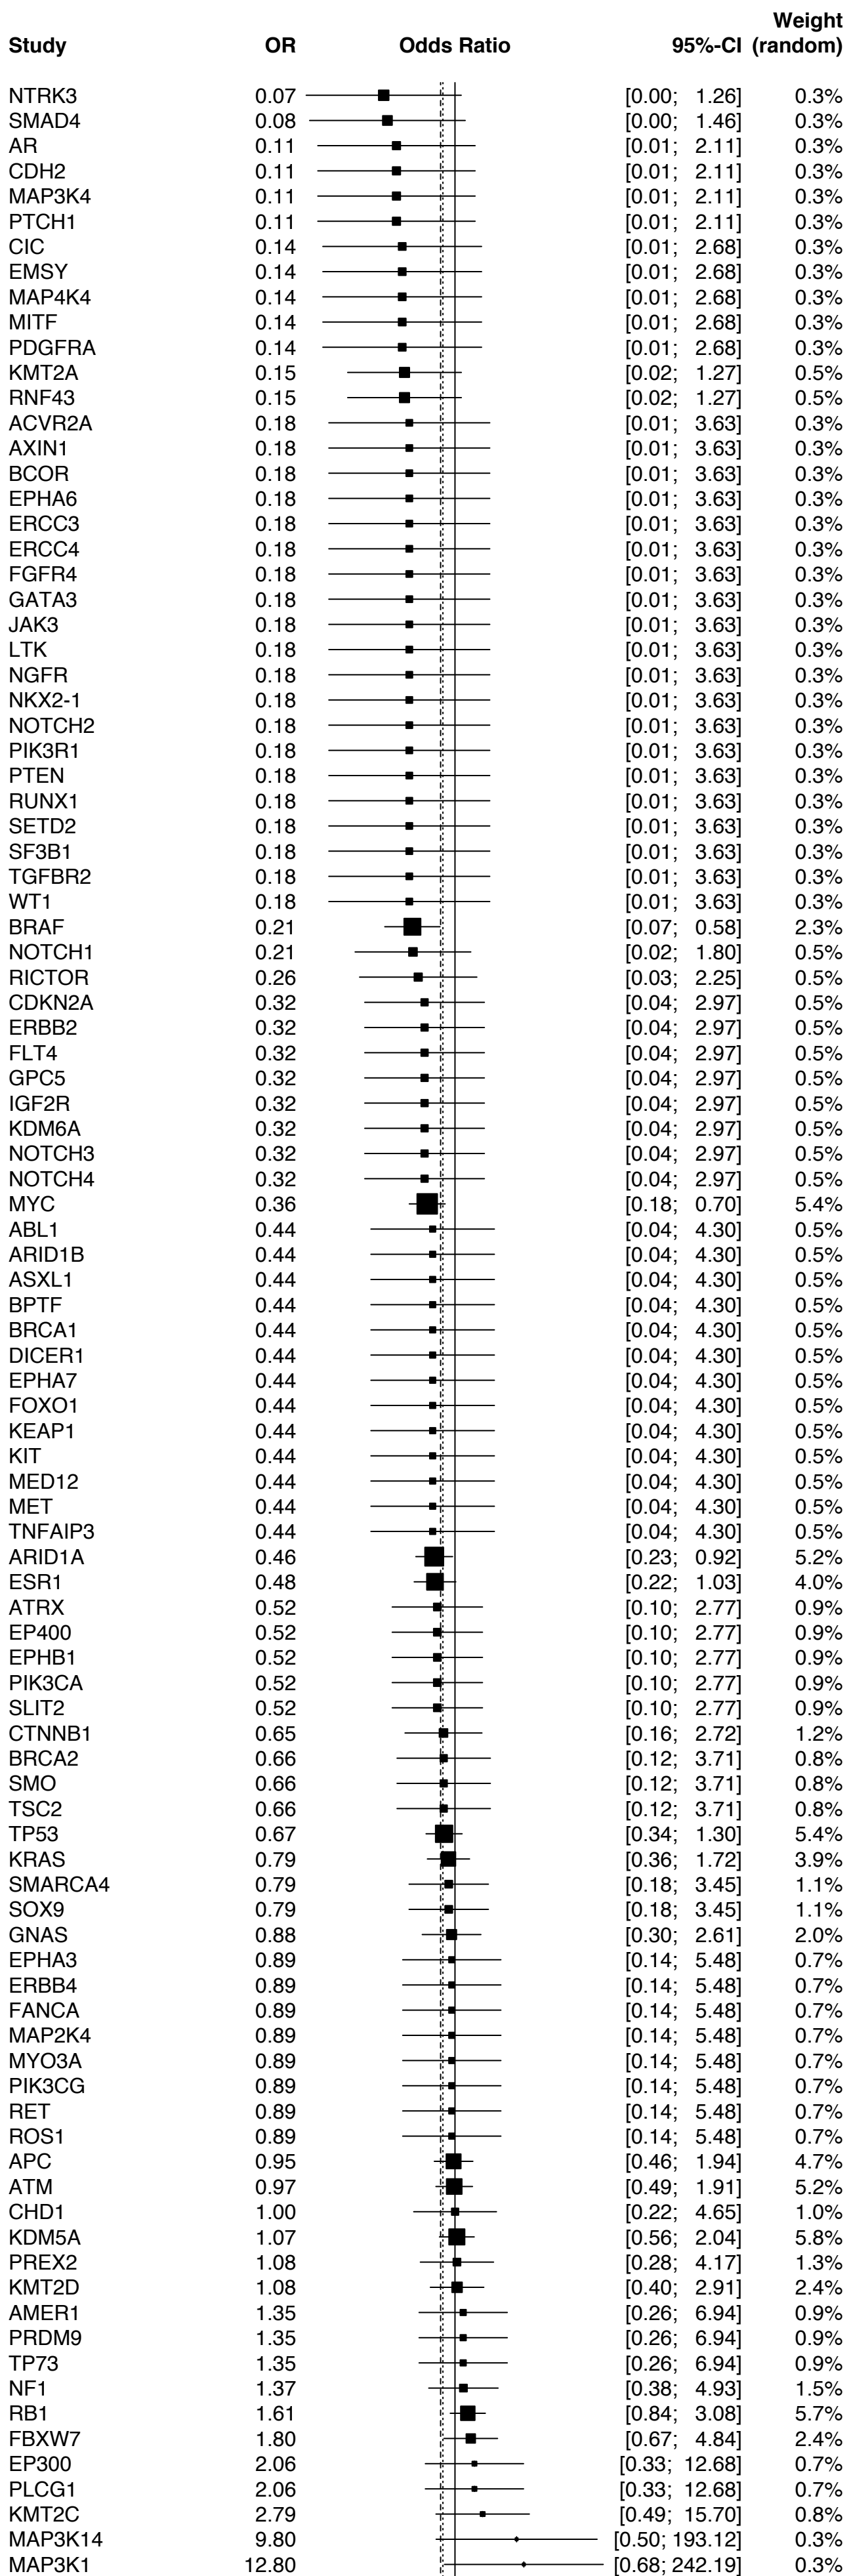

0.01 0.1 1 10 100
