# Supplementary material for: The molecular characteristics of high-grade gastroenteropancreatic neuroendocrine neoplasms
Source: PubMed Central journal article supplement (PMC8630776; doi:10.1530/erc-21-0152), 2021-10-14
Supplement: supplementary_figure_14.pdf [file supplementary_figure_14.pdf]

| Study   | OR    | Odds Ratio | 95%-CI (random) | Weight |
|---------|-------|------------|-----------------|--------|
| KRAS    | 0.05  |            | [0.00; 0.89]    | 0.5%   |
| TP53    | 0.08  |            | [0.02; 0.24]    | 2.9%   |
| BRAF    | 0.09  |            | [0.01; 0.69]    | 0.9%   |
| FBXW7   | 0.16  |            | [0.01; 2.83]    | 0.5%   |
| KMT2A   | 0.16  |            | [0.01; 2.83]    | 0.5%   |
| AR      | 0.25  |            | [0.01; 4.74]    | 0.4%   |
| RICTOR  | 0.25  |            | [0.01; 4.74]    | 0.4%   |
| SLIT2   | 0.25  |            | [0.01; 4.74]    | 0.4%   |
| SMARCA4 | 0.25  |            | [0.01; 4.74]    | 0.4%   |
| SOX9    | 0.25  |            | [0.01; 4.74]    | 0.4%   |
| APC     | 0.29  |            | [0.08; 1.03]    | 2.3%   |
| GNAS    | 0.31  |            | [0.04; 2.55]    | 0.9%   |
| BRCA2   | 0.31  |            | [0.02; 6.02]    | 0.4%   |
| EMSY    | 0.31  |            | [0.02; 6.02]    | 0.4%   |
| ERBB2   | 0.31  |            | [0.02; 6.02]    | 0.4%   |
| FLT4    | 0.31  |            | [0.02; 6.02]    | 0.4%   |
| GPC5    | 0.31  |            | [0.02; 6.02]    | 0.4%   |
| IGF2R   | 0.31  |            | [0.02; 6.02]    | 0.4%   |
| MAP4K4  | 0.31  |            | [0.02; 6.02]    | 0.4%   |
| MITF    | 0.31  |            | [0.02; 6.02]    | 0.4%   |
| SMO     | 0.31  |            | [0.02; 6.02]    | 0.4%   |
| NTRK3   | 0.35  |            | [0.04; 2.95]    | 0.8%   |
| RNF43   | 0.35  |            | [0.04; 2.95]    | 0.8%   |
| MYC     | 0.37  |            | [0.16; 0.89]    | 5.1%   |
| ABL1    | 0.41  |            | [0.02; 8.16]    | 0.4%   |
| ACVR2A  | 0.41  |            | [0.02; 8.16]    | 0.4%   |
| AXIN1   | 0.41  |            | [0.02; 8.16]    | 0.4%   |
| BCOR    | 0.41  |            | [0.02; 8.16]    | 0.4%   |
| EPHA3   | 0.41  |            | [0.02; 8.16]    | 0.4%   |
| EPHA6   | 0.41  |            | [0.02; 8.16]    | 0.4%   |
| EPHA7   | 0.41  |            | [0.02; 8.16]    | 0.4%   |
| ERBB4   | 0.41  |            | [0.02; 8.16]    | 0.4%   |
| ERCC3   | 0.41  |            | [0.02; 8.16]    | 0.4%   |
| ERCC4   | 0.41  |            | [0.02; 8.16]    | 0.4%   |
| FGFR4   | 0.41  |            | [0.02; 8.16]    | 0.4%   |
| FOXO1   | 0.41  |            | [0.02; 8.16]    | 0.4%   |
| KIT     | 0.41  |            | [0.02; 8.16]    | 0.4%   |
| LTK     | 0.41  |            | [0.02; 8.16]    | 0.4%   |
| MED12   | 0.41  |            | [0.02; 8.16]    | 0.4%   |
| MET     | 0.41  |            | [0.02; 8.16]    | 0.4%   |
| MYO3A   | 0.41  |            | [0.02; 8.16]    | 0.4%   |
| NKX2-1  | 0.41  |            | [0.02; 8.16]    | 0.4%   |
| NOTCH2  | 0.41  |            | [0.02; 8.16]    | 0.4%   |
| PIK3CG  | 0.41  |            | [0.02; 8.16]    | 0.4%   |
| PIK3R1  | 0.41  |            | [0.02; 8.16]    | 0.4%   |
| PRDM9   | 0.41  |            | [0.02; 8.16]    | 0.4%   |
| RUNX1   | 0.41  |            | [0.02; 8.16]    | 0.4%   |
| TGFBR2  | 0.41  |            | [0.02; 8.16]    | 0.4%   |
| TNFAIP3 | 0.41  |            | [0.02; 8.16]    | 0.4%   |
| WT1     | 0.41  |            | [0.02; 8.16]    | 0.4%   |
| CTNNB1  | 0.48  |            | [0.06; 4.18]    | 0.8%   |
| KMT2D   | 0.57  |            | [0.12; 2.77]    | 1.5%   |
| CDH2    | 0.59  |            | [0.07; 5.23]    | 0.8%   |
| EP400   | 0.59  |            | [0.07; 5.23]    | 0.8%   |
| EPHB1   | 0.59  |            | [0.07; 5.23]    | 0.8%   |
| MAP3K4  | 0.59  |            | [0.07; 5.23]    | 0.8%   |
| NF1     | 0.59  |            | [0.07; 5.23]    | 0.8%   |
| PIK3CA  | 0.59  |            | [0.07; 5.23]    | 0.8%   |
| PREX2   | 0.59  |            | [0.07; 5.23]    | 0.8%   |
| RB1     | 0.70  |            | [0.29; 1.72]    | 4.8%   |
| CDKN2A  | 0.74  |            | [0.08; 6.91]    | 0.8%   |
| CHD1    | 0.74  |            | [0.08; 6.91]    | 0.8%   |
| NOTCH4  | 0.74  |            | [0.08; 6.91]    | 0.8%   |
| PDGFRA  | 0.74  |            | [0.08; 6.91]    | 0.8%   |
| SMAD4   | 0.85  |            | [0.17; 4.32]    | 1.4%   |
| ARID1B  | 1.00  |            | [0.10; 10.01]   | 0.7%   |
| ASXL1   | 1.00  |            | [0.10; 10.01]   | 0.7%   |
| BPTF    | 1.00  |            | [0.10; 10.01]   | 0.7%   |
| BRCA1   | 1.00  |            | [0.10; 10.01]   | 0.7%   |
| DICER1  | 1.00  |            | [0.10; 10.01]   | 0.7%   |
| JAK3    | 1.00  |            | [0.10; 10.01]   | 0.7%   |
| KEAP1   | 1.00  |            | [0.10; 10.01]   | 0.7%   |
| MAP2K4  | 1.00  |            | [0.10; 10.01]   | 0.7%   |
| NGFR    | 1.00  |            | [0.10; 10.01]   | 0.7%   |
| NOTCH1  | 1.00  |            | [0.19; 5.25]    | 1.4%   |
| RET     | 1.00  |            | [0.10; 10.01]   | 0.7%   |
| TP73    | 1.00  |            | [0.10; 10.01]   | 0.7%   |
| ARID1A  | 1.20  |            | [0.52; 2.79]    | 5.4%   |
| PTCH1   | 1.21  |            | [0.22; 6.63]    | 1.3%   |
| KDM5A   | 1.26  |            | [0.54; 2.92]    | 5.4%   |
| ESR1    | 1.29  |            | [0.54; 3.09]    | 5.0%   |
| CIC     | 1.54  |            | [0.27; 8.86]    | 1.2%   |
| NOTCH3  | 1.54  |            | [0.27; 8.86]    | 1.2%   |
| TSC2    | 1.54  |            | [0.27; 8.86]    | 1.2%   |
| ATM     | 1.77  |            | [0.76; 4.16]    | 5.3%   |
| FANCA   | 2.07  |            | [0.33; 13.07]   | 1.1%   |
| GATA3   | 2.07  |            | [0.33; 13.07]   | 1.1%   |
| PTEN    | 2.07  |            | [0.33; 13.07]   | 1.1%   |
| ROS1    | 2.07  |            | [0.33; 13.07]   | 1.1%   |
| KDM6A   | 2.39  |            | [0.50; 11.40]   | 1.6%   |
| AMER1   | 3.23  |            | [0.61; 16.99]   | 1.4%   |
| SF3B1   | 3.23  |            | [0.61; 16.99]   | 1.4%   |
| ATRX    | 3.42  |            | [0.91; 12.80]   | 2.2%   |
| SETD2   | 4.48  |            | [0.94; 21.36]   | 1.6%   |
| MEN1    | 11.09 |            | [2.10; 58.62]   | 1.4%   |
| DAXX    | 13.76 |            | [1.47; 128.75]  | 0.8%   |

0.01 0.1 1 10 100
