# Supplementary material for: The molecular characteristics of high-grade gastroenteropancreatic neuroendocrine neoplasms
Source: PubMed Central journal article supplement (PMC8630776; doi:10.1530/erc-21-0152), 2021-10-14
Supplement: supplementary_material.pdf [file supplementary_material.pdf]

## 1 **Supplementary Methods**

### 2 **Patients and samples**

3 Patients diagnosed with High Grade GEP NEN were from 2013 to 2017 included  
4 prospectively in a Nordic GEP Registry (n=279). Inclusion criteria were: histopathological  
5 confirmed diagnosis of neuroendocrine neoplasm (Ki-67>20%) with a gastroenteropancreatic  
6 primary or an unknown primary (CUP) predominantly with GI metastases (as defined by CT  
7 scans). Clinical information, tumour tissue and a whole blood sample for normal tissue  
8 analyses were collected. Histological sections (HE, CgA, synaptophysin, Ki-67) were  
9 collected and sent for centralized pathological re-evaluation by three pathologists (A.P.,  
10 I.M.B.L. and A.C.) for validation of NEN G3 diagnosis, cell-type and recount of Ki-67. After  
11 initial independent evaluations, consensus was reached. Cases lacking normal-tissue (n=56),  
12 lacking slides for re-evaluation (n=2) or reassessed as NET G2 (n=1), adenocarcinoma  
13 (n=14), MiNen (n=23) or ambiguous (n=11) were excluded. Thus, a total of 181 samples were  
14 included for molecular analyses, out of which 152 were from patients with neuroendocrine  
15 carcinomas (NEC) and 29 with neuroendocrine tumours G3 (NET G3).

16

### 17 **Tissue collection and isolation of DNA**

18 For tumour samples, the areas of interest (i.e. areas with high tumour cell content), were  
19 visualized by morphology and synaptophysin, chromogranin A and Ki-67 staining. Tissue  
20 cores of 8 to 10  $\mu$ M or (1.2 mm diameter) from tumour areas were manually macrodissected.  
21 The number of sections or cores taken from each block varied between the specimens,  
22 depending on the tumour tissue depth (in total, approximately 5 mg tissue was collected for  
23 each sample).

24 DNA isolation from formalin fixed paraffin embedded (FFPE) tumour specimens was  
25 carried out by Adaptive Focused Acoustics (AFA)-based extraction using the Covaris

26 truXTRAC FFPE DNA kit (Woburn, MA, USA). The extraction was performed according to  
27 the protocol provided by Covaris, with the following adjustments: the collected FFPE tissue,  
28 for each sample, were pooled in a screw-cap microTUBE. AFA was performed as per the  
29 manufacturer's instructions (protocol C) on a Covaris M220 Focused Ultrasonicator. Paraffin  
30 was removed and tissue rehydrated in a total amount of 100µl processing buffer master mix  
31 containing 88µl of tissue and SDS mixed with 22 µl of proteinase K (EC.3.4.21.64, Product  
32 No. SRE0005, Sigma–Aldrich). Homogenized tissue was then digested at 56 C overnight,  
33 followed by 1 h at 80 C to reverse the formaldehyde crosslinks. DNA was isolated from the  
34 digested lysates using columns of the Covaris truXTRAC FFPE DNA kit and was eluted in  
35 100µl of Covaris BE buffer. Before library preparation for sequencing, all DNA samples  
36 underwent DNA repair to rectify some of the damage inflicted by fixation, paraffin  
37 embedding and isolation. For this purpose we used the DNA repair mix kit (NEBNext FFPE  
38 DNA kit, UK), according to the manufacturer's instructions.

39 Genomic DNA from normal tissue (blood) was isolated from peripheral blood using  
40 QIAamp DNA Mini Kit (Qiagen, Hilden, Germany), according to the manufacturer's protocol  
41 with the exception that we used 400 µl of blood as input in the isolation procedure.

42

### 43 **MSI analysis**

44 The microsatellite instability (MSI) status of each of the tumours was determined using the  
45 Promega MSI analysis system (Version 1.2, Promega, Madison, WI, US) following the  
46 manufacturer's instructions. Tumours with at least two of five mononucleotide markers  
47 altered were classified as MSI-H.

48

49

50

## 51 **Quality control strategy**

52 Before sequencing library was prepared, the DNA underwent several steps of quality control:

53 1) Preliminary quantification and purity by  $A_{260}/A_{230}$  and  $A_{260}/A_{280}$  ratios were assessed by  
54 measurements at a NanoDrop NT-1000 spectrophotometer. 2) The amount of dsDNA  
55 assessed by fluorometry using the Qubit double-stranded DNA (dsDNA) BR Assay Kit  
56 (Thermo Fisher Scientific, Waltham, MA, USA). 3) The size distribution / presence of high  
57 molecular weight DNA was assessed by Agilent 2100 Bioanalyzer (DNA 12000 kit; Agilent  
58 Technologies, Santa Clara, California, USA). For a randomly selected set of samples (n=26),  
59 we quantified the amount of amplifiable DNA by use of the KAPA hgDNA quantification and  
60 QC kit (Roche), as per manufacturer's instructions. This assessment relied on quantitative-  
61 PCR amplification of a 41 bp, 129 bp and 305 bp fragment of a highly conserved single copy  
62 gene. Real-time PCR was performed in a LightCycler 480 instrument (Roche, Basel,  
63 Switzerland) to generate standard curves. The 41 bp amplicon is used for absolute  
64 quantification of DNA samples against a set of DNA standards. DNA quality is assessed by  
65 normalizing the concentration obtained with the 129 and 305 bp amplicon against the one  
66 obtained with 41 bp assay (Q-score). Tumor DNA considered integer having optimally Q-  
67 score  $\approx 1$  for both Q129/Q41 and the Q305/Q41 ratios.

68

## 69 **Library preparation and sequencing**

70 Targeted massive parallel sequencing was performed on DNA from FFPE tumor tissue and  
71 from matched normal peripheral blood DNA. DNA from each specimen was used to prepare  
72 Illumina libraries applying the Kapa Hyper Prep kit (Kapa Biosystem) and the Agilent  
73 SureSelect XT-kit (Agilent Technologies, Santa Clara, CA, United States of America).  
74 Targeted enrichment was performed using a custom RNA bait design according to the  
75 manufacturer's guidelines (SureSelect, Agilent, UK). The baits were targeted against an in-

76 house cancer gene panel designed to pull down entire coding regions of 360 cancer related  
77 genes (Yates, *et al.* 2015). The total design was of approximately 2 Mb in size.

78 We created targeted capture pulldown (average insert size, 140bp) libraries and  
79 generated paired-end sequence data (75bp) using MiSeq instrument (Illumina, San Diego,  
80 CA, United States of America) with an average sequencing depth of 136-fold (range 75x –  
81 300x) for the tumours and 165-fold (range 50x- 272x) for the normal.

82

### 83 **Data processing and bioinformatics analysis**

84

#### 85 Mapping and alteration calling

86 Raw sequence data was aligned to the human reference genome (Build-UCSC hg19) using  
87 BWA (Li and Durbin 2009) with default parameters. Quality control of the raw input data  
88 performed with FastQC program (<http://www.bioinformatics.babraham.ac.uk/projects/fastqc>).

89 Somatic substitutions and insertions/deletions were detected using CaVEMan and Pindel  
90 respectively (Jones, *et al.* 2016); Raine, *et al.* 2015). ANNOVAR was used for vcf file  
91 annotation (Yang and Wang 2015). All somatic mutations were validated by manual  
92 inspection of sequencing reads using the Integrative Genomics Viewer IGV tool and  
93 COSMIC database. Further analysis was restricted to mutations in protein coding regions of  
94 the genome. In order to provide a complete overview of the mutations in the 360 genes in  
95 GEP-NEN, the data set was not restricted to driver-mutations. Allele specific copy number  
96 analysis was performed using FACETS (Fraction and Allele-Specific Copy Number  
97 Estimates from Tumor Sequencing) (Shen and Seshan 2016), suitable for targeted sequencing  
98 gene panels. FACETS was also applied for estimation of tumour ploidy as well as tumour  
99 purity in the tissue samples. Genomic Identifications of Significant Targets in Cancer  
100 (GISTIC) 2.0 (Mermel, *et al.* 2011) was used to identify frequent focal- and arm level-

101 amplifications and deletions (somatic copy number alterations; SCNAs). Arm-level gain and  
102 loss were defined as log<sub>2</sub> depth ratios > 0.1 and < -0.1 respectively. Segments with 0 minor  
103 copy number were defined as LOH.

104

#### 105 Illustrations

106 Oncoplots and illustrations of somatic mutation interactions (co-occurrence and mutual  
107 exclusivity) were generated by the R package Maftools (Mayakonda, *et al.* 2018). Focal levels  
108 of amplifications or deletions at a specific locus of the genome were illustrated using copy  
109 number R package (Nilsen, *et al.* 2012). IRanges R package as well as the Heatmap() function  
110 from ComplexHeatmap R package were utilized to build the heatmaps (Gu, *et al.* 2016);  
111 Lawrence, *et al.* 2013). Forest plots were generated by R package meta (Balduzzi, *et al.*  
112 2019).

113

#### 114 Targetable mutations

115 Genes affected by targetable mutations were defined based on literature search and classified  
116 in 12 different categories / functional pathways (BRAF, KRAS, MSI, FGFR, AKT, MTOR,  
117 PIK3CA, HER, Endocrine, TGF $\beta$ , Homologous repair and DNA repair). The genes /  
118 mutations regarded as targetable within each category are listed in [Supplementary Table S1](#).  
119 The specific alterations of oncogenes termed “targetable” were restricted those where drugs  
120 have been proven to have an effect; e.g. for the BRAF and KRAS genes, the term “targetable  
121 alteration” was restricted to *BRAF* V600E/K and *KRAS* G12C, respectively. For tumour  
122 suppressor genes (typically those involved in DNA repair), any alteration potentially  
123 impairing function was counted as targetable; the lists for tumour suppressor genes involved  
124 in homologous repair and general DNA repair, was previously published as list used for  
125 identification of predictive markers for PARP-inhibition (olaparib) in primary treatment naïve

126 breast cancer (Eikesdal, *et al.* 2020). Tumours scored as MSI were included as harboring  
127 targetable alterations, as MSI is increasingly used as a biomarker for checkpoint inhibitors.

128

### 129 Pathway analyses

130 Pathway analyses was performed using a restricted number of known oncogenes and tumor  
131 suppressor genes involved in key oncogenic signaling pathways (Supplementary Table S1).

132 The schematic representation was done by the function oncoPrint() from ComplexHeatmap R  
133 package (Gu, *et al.* 2016).

134

### 135 Prediction model

136 A prediction model for classification of tumours into the categories LC NEC or NET G3 was  
137 built, based on mutational status of nine genes (*APC*, *ATRX*, *BRAF*, *DAXX*, *KRAS*, *MEN1*,  
138 *MYO5B*, *SMAD2* and *TP53*). Classification was performed using C5.0 decision tree algorithm  
139 implemented in R package C50 (v0.1.2) (Quinlan 2007). Thirty boosting iterations were used.

140 Input data and code used are given in Supplementary files S1-S3.

141

### 142 **Statistics**

143 All statistical analyses were performed in the statistical programming language R (v3.5.1).  
144 Differences in mutation frequency between groups were assessed by odds ratio (OR)  
145 estimates with 95% confidence intervals (CI) and by Fischer exact test. Overall survival (OS)  
146 was assessed from the date of diagnosis to the date of death or last follow-up. Survival curves  
147 were drawn according the Kaplan-Meier method and differences within groups were assessed  
148 by long-rank tests. All p-values are given as two sided and p-values < 0.05 were considered  
149 statistically significant.

150

151 **Ethics**

152 The research protocol was approved by ethics committees in Norway (REK vest 2012/940),

153 Sweden (REC Uppsala Dnr 2012/285) and Denmark (Region Hovedstaden H-4-2012-108).

154 All patients signed informed written consent.

155

156

157

158 **Supplementary references**

159 Balduzzi S, Rucker G & Schwarzer G 2019 How to perform a meta-analysis with R: a practical tutorial.

160 *Evid Based Ment Health* 22 153-160.

161

162 Eikesdal HP, Yndestad S, Elzawahry A, Llop-Guevara A, Gilje B, Blix ES, Espelid H, Lundgren S, Geisler J,

163 Vagstad G, et al. 2020 Olaparib monotherapy as primary treatment in unselected triple negative

164 breast cancer. *Ann Oncol*.

165

166 Gu Z, Eils R & Schlesner M 2016 Complex heatmaps reveal patterns and correlations in

167 multidimensional genomic data. *Bioinformatics* 32 2847-2849.

168

169 Jones D, Raine KM, Davies H, Tarpey PS, Butler AP, Teague JW, Nik-Zainal S & Campbell PJ 2016

170 cgpCaVEManWrapper: Simple Execution of CaVEMan in Order to Detect Somatic Single Nucleotide

171 Variants in NGS Data. *Curr Protoc Bioinformatics* 56 15 10 11-15 10 18.

172

173 Lawrence M, Huber W, Pages H, Aboyoun P, Carlson M, Gentleman R, Morgan MT & Carey VJ 2013

174 Software for computing and annotating genomic ranges. *PLoS Comput Biol* 9 e1003118.

175

176 Li H & Durbin R 2009 Fast and accurate short read alignment with Burrows-Wheeler transform.

177 *Bioinformatics* 25 1754-1760.

178

179 Mayakonda A, Lin DC, Assenov Y, Plass C & Koeffler HP 2018 Maftools: efficient and comprehensive

180 analysis of somatic variants in cancer. *Genome Res* 28 1747-1756.

181

182 Mermel CH, Schumacher SE, Hill B, Meyerson ML, Beroukhi R & Getz G 2011 GISTIC2.0 facilitates

183 sensitive and confident localization of the targets of focal somatic copy-number alteration in human

184 cancers. *Genome Biol* 12 R41.

185

186 Nilsen G, Liestol K, Van Loo P, Moen Vollaun HK, Eide MB, Rueda OM, Chin SF, Russell R, Baumbusch

187 LO, Caldas C, et al. 2012 Copynumber: Efficient algorithms for single- and multi-track copy number

188 segmentation. *BMC Genomics* 13 591.

189

190 Quinlan JR 2007 C5. <http://rulequest.com>.

191

192 Raine KM, Hinton J, Butler AP, Teague JW, Davies H, Tarpey P, Nik-Zainal S & Campbell PJ 2015

193 cgPindel: Identifying Somatic Acquired Insertion and Deletion Events from Paired End

194 Sequencing. *Curr Protoc Bioinformatics* 52 15 17 11-12.

195

196 Shen R & Seshan VE 2016 FACETS: allele-specific copy number and clonal heterogeneity analysis tool

197 for high-throughput DNA sequencing. *Nucleic Acids Res* 44 e131.

198



199 Yang H & Wang K 2015 Genomic variant annotation and prioritization with ANNOVAR and  
200 wANNOVAR. *Nat Protoc* 10 1556-1566.

201

202 Yates LR, Gerstung M, Knappskog S, Desmedt C, Gundem G, Van Loo P, Aas T, Alexandrov LB,  
203 Larsimont D, Davies H, et al. 2015 Subclonal diversification of primary breast cancer revealed by  
204 multiregion sequencing. *Nat Med* 21 751-759.

205

206
